# Supplementary material for: Immune profiles of male giant panda (Ailuropoda melanoleuca) during the breeding season
Source: BMC Genomics. 2021 Feb 28;22:143. doi: 10.1186/s12864-021-07456-x (PMC7916315; doi:10.1186/s12864-021-07456-x)
Supplement: Supplementary file 1 — Additional file 1: Table S1. Differentially expressed genes between the breeding season and the non-breeding season. 1128 genes changed in expression level were detected with a given FDR threshold. The table contains three columns, including GENEID, log2FC and FDR. [file 12864_2021_7456_MOESM1_ESM.xlsx]

## Sheet: Sheet1
GENEID	log2FC	FDR
ENSAMEG00000018663	4.56958	2.24e-09
ENSAMEG00000019379	4.49097	1.08e-17
ENSAMEG00000011115	4.451	4.44e-35
ENSAMEG00000002925	4.3578	5.89e-17
ENSAMEG00000015181	4.21889	6.48e-43
ENSAMEG00000016046	4.19148	4.3e-17
ENSAMEG00000006078	3.92901	1.64e-23
ENSAMEG00000011000	3.90692	2.24e-16
ENSAMEG00000005289	3.75049	0.000807393
ENSAMEG00000007287	3.62931	7.1e-17
ENSAMEG00000006684	3.52	1.46e-18
ENSAMEG00000010434	3.34921	1.03e-09
ENSAMEG00000015065	3.33413	3.63e-05
ENSAMEG00000010908	3.28158	1.39e-09
ENSAMEG00000002031	3.26671	1.31e-09
ENSAMEG00000017964	3.22123	3.1e-17
ENSAMEG00000005805	3.22121	1.03e-07
ENSAMEG00000014262	3.18286	8.84e-23
ENSAMEG00000011561	3.12685	1.16e-06
ENSAMEG00000017818	3.11755	3.33e-08
ENSAMEG00000010574	3.10292	4.93e-09
ENSAMEG00000002287	3.085	9.75e-08
ENSAMEG00000014955	3.08294	2.7e-17
ENSAMEG00000016965	3.07683	0.000923594
ENSAMEG00000009115	3.04995	4.23e-07
ENSAMEG00000009411	3.00782	7.3e-12
ENSAMEG00000012211	3.00245	3.57e-26
ENSAMEG00000003910	2.9693	2.72e-18
ENSAMEG00000017499	2.96011	3.5e-09
ENSAMEG00000002107	2.92929	9.13e-26
ENSAMEG00000023445	-2.90333	8.26e-06
ENSAMEG00000003976	2.8698	9.4e-24
ENSAMEG00000007496	2.86479	3.71e-13
ENSAMEG00000003187	-2.85555	3.64e-10
ENSAMEG00000000920	2.83224	5.87e-19
ENSAMEG00000003975	2.81108	1.05e-05
ENSAMEG00000011769	2.79411	1.25e-16
ENSAMEG00000007425	2.78135	1.55e-15
ENSAMEG00000013935	2.77643	3.32e-08
ENSAMEG00000001193	2.76855	1.42e-10
ENSAMEG00000002828	2.74639	6.32e-07
ENSAMEG00000009878	2.72689	1.35e-10
ENSAMEG00000011521	2.72209	3.14e-07
ENSAMEG00000011231	2.71714	1.46e-18
ENSAMEG00000004609	2.71668	3.64e-05
ENSAMEG00000020113	2.71226	5.74e-06
ENSAMEG00000016289	2.70914	1.63e-18
ENSAMEG00000014117	2.70416	7.3e-15
ENSAMEG00000011748	-2.69382	0.0295055
ENSAMEG00000003015	2.69043	1.39e-09
ENSAMEG00000013428	2.68305	0.0165524
ENSAMEG00000010340	2.65992	0.000390446
ENSAMEG00000018981	2.64615	8.65e-06
ENSAMEG00000021079	-2.62478	1.15e-14
ENSAMEG00000006552	2.6247	1.53e-15
ENSAMEG00000023161	-2.61526	3.9e-10
ENSAMEG00000005357	2.60154	5.62e-08
ENSAMEG00000006512	2.59307	1.31e-07
ENSAMEG00000018017	2.56469	4.12e-05
ENSAMEG00000011221	2.54359	1.8e-06
ENSAMEG00000019255	2.54122	0.000246967
ENSAMEG00000000270	2.52773	7.92e-18
ENSAMEG00000004205	2.48213	1.25e-05
ENSAMEG00000017176	2.47763	2.11e-15
ENSAMEG00000001821	2.47175	4.52e-08
ENSAMEG00000010930	2.46061	2.7e-06
ENSAMEG00000015145	2.4591	1.64e-08
ENSAMEG00000002576	2.4534	2.67e-09
ENSAMEG00000017378	2.45325	8.26e-05
ENSAMEG00000015642	2.4511	7.86e-06
ENSAMEG00000001032	2.45008	3.57e-14
ENSAMEG00000009071	2.44518	2.8e-12
ENSAMEG00000008880	2.43363	1.67e-14
ENSAMEG00000007142	2.42081	5.36e-06
ENSAMEG00000010507	2.41154	1.69e-12
ENSAMEG00000010888	2.40284	1.9e-13
ENSAMEG00000010331	2.39996	7.53e-08
ENSAMEG00000015237	2.3899	4.28e-09
ENSAMEG00000009068	2.38911	6.58e-10
ENSAMEG00000015259	2.38615	1.33e-09
ENSAMEG00000004289	2.36284	5.83e-05
ENSAMEG00000012665	2.36069	2.21e-06
ENSAMEG00000009971	2.35811	7.59e-12
ENSAMEG00000001262	2.35738	5.62e-08
ENSAMEG00000015424	2.35667	0.00182236
ENSAMEG00000013093	2.3507	1.23e-08
ENSAMEG00000013770	2.32523	1.53e-15
ENSAMEG00000017623	2.30606	1.42e-10
ENSAMEG00000008356	2.29955	4.56e-09
ENSAMEG00000001168	2.29746	6.07e-12
ENSAMEG00000017489	2.27849	2.64e-06
ENSAMEG00000016760	2.26426	8.58e-08
ENSAMEG00000013414	2.26076	1.98e-08
ENSAMEG00000015240	2.25163	2.31e-10
ENSAMEG00000009428	2.24942	1.6e-05
ENSAMEG00000000717	2.24075	1.42e-10
ENSAMEG00000003509	2.23973	1.36e-05
ENSAMEG00000004730	-2.23839	1.54e-06
ENSAMEG00000014279	2.23475	1.01e-05
ENSAMEG00000009331	2.23285	1.05e-10
ENSAMEG00000002192	2.22659	2.44e-10
ENSAMEG00000007095	2.2253	2.02e-09
ENSAMEG00000001860	2.22422	0.00584456
ENSAMEG00000016061	2.21986	6.99e-11
ENSAMEG00000004175	2.21683	9.76e-06
ENSAMEG00000013769	2.21546	1.56e-06
ENSAMEG00000000570	2.21102	7.93e-16
ENSAMEG00000009491	2.20285	0.0304759
ENSAMEG00000001772	2.20181	1.28e-06
ENSAMEG00000012239	2.20036	0.000553444
ENSAMEG00000006568	2.19099	3.44e-09
ENSAMEG00000008240	2.18648	2.04e-07
ENSAMEG00000007538	2.17527	3.77e-06
ENSAMEG00000019650	2.17474	1.41e-07
ENSAMEG00000013441	-2.16356	3.77e-08
ENSAMEG00000015444	2.16102	3.18e-11
ENSAMEG00000003479	2.15842	9.5e-05
ENSAMEG00000013168	2.15828	1e-12
ENSAMEG00000014247	2.15114	0.000332209
ENSAMEG00000006454	2.151	3.01e-08
ENSAMEG00000013676	2.14603	1.9e-07
ENSAMEG00000023439	-2.14533	0.000280323
ENSAMEG00000015439	2.14054	2.41e-09
ENSAMEG00000008106	2.13925	2.64e-15
ENSAMEG00000013269	2.13745	6.52e-09
ENSAMEG00000010317	2.12151	1.9e-05
ENSAMEG00000018688	2.11757	2.31e-08
ENSAMEG00000020713	2.11347	0.0478307
ENSAMEG00000011031	2.11142	0.00976224
ENSAMEG00000010093	2.11083	0.00022125
ENSAMEG00000017634	2.10924	8.33e-09
ENSAMEG00000023443	-2.10896	0.000289287
ENSAMEG00000011222	2.10586	2.86e-06
ENSAMEG00000008123	2.10232	3.52e-05
ENSAMEG00000015391	2.099	1.74e-11
ENSAMEG00000009864	2.09632	0.000791176
ENSAMEG00000016175	2.09257	4.46e-06
ENSAMEG00000002960	2.09192	3.11e-08
ENSAMEG00000011479	2.0858	0.000151445
ENSAMEG00000009639	2.08206	3.53e-08
ENSAMEG00000006095	2.07866	2.21e-06
ENSAMEG00000008510	2.0772	6.96e-05
ENSAMEG00000013945	2.07651	1.9e-05
ENSAMEG00000012236	2.0743	0.0014012
ENSAMEG00000023433	-2.07177	0.00271953
ENSAMEG00000002166	2.06273	0.00638536
ENSAMEG00000020158	2.06242	4.21e-09
ENSAMEG00000012655	2.06084	1.71e-06
ENSAMEG00000005802	2.05847	4.28e-09
ENSAMEG00000011927	2.05356	2.04e-14
ENSAMEG00000016834	2.04715	1.64e-08
ENSAMEG00000007836	-2.03447	0.00717564
ENSAMEG00000018738	2.02982	1.1e-08
ENSAMEG00000021606	-2.02489	0.00533833
ENSAMEG00000016236	2.01883	0.000369839
ENSAMEG00000009178	2.01608	0.0151335
ENSAMEG00000002141	2.01549	0.00107881
ENSAMEG00000015546	2.01315	0.00250874
ENSAMEG00000006204	2.01137	1.69e-06
ENSAMEG00000019804	2.00085	0.000104098
ENSAMEG00000014999	1.99918	0.000159548
ENSAMEG00000013344	1.99358	0.000205547
ENSAMEG00000007558	1.98719	0.000137098
ENSAMEG00000006126	1.98524	9.53e-06
ENSAMEG00000004634	-1.98438	0.000235925
ENSAMEG00000000103	1.98248	1.52e-06
ENSAMEG00000005589	-1.9818	0.0066182
ENSAMEG00000003340	1.98152	0.00046572
ENSAMEG00000017717	1.97841	0.00654978
ENSAMEG00000017362	1.96033	0.00250874
ENSAMEG00000001703	1.95943	0.000418257
ENSAMEG00000012030	1.95802	0.000134179
ENSAMEG00000015515	1.95405	0.000328945
ENSAMEG00000013901	1.94368	0.000422199
ENSAMEG00000005801	1.94243	0.0023922
ENSAMEG00000006027	1.9346	0.000369839
ENSAMEG00000011809	1.92586	9.12e-08
ENSAMEG00000003838	1.92021	4.26e-06
ENSAMEG00000014298	1.91821	2e-07
ENSAMEG00000016161	1.91345	5.92e-08
ENSAMEG00000018731	1.90984	9.8e-09
ENSAMEG00000012695	1.89844	0.000262674
ENSAMEG00000008249	1.89749	0.00267747
ENSAMEG00000019495	1.89207	1.54e-09
ENSAMEG00000019795	1.88929	4.09e-07
ENSAMEG00000015001	1.88656	7.53e-08
ENSAMEG00000016563	1.88602	2.8e-08
ENSAMEG00000011893	1.88549	0.00295666
ENSAMEG00000000477	-1.88275	0.000100049
ENSAMEG00000020140	-1.87935	5.3e-05
ENSAMEG00000001813	1.87103	1.41e-08
ENSAMEG00000004644	1.87047	0.000205621
ENSAMEG00000012232	1.86773	0.00281712
ENSAMEG00000015235	1.86399	6.25e-08
ENSAMEG00000009363	-1.86371	0.013342
ENSAMEG00000010228	1.86178	6.48e-05
ENSAMEG00000013371	-1.8537	0.0371463
ENSAMEG00000012652	1.85039	2.51e-05
ENSAMEG00000004586	1.84728	0.000266717
ENSAMEG00000000200	1.8463	0.0131124
ENSAMEG00000003110	1.84352	1.56e-06
ENSAMEG00000014647	1.84079	2.78e-06
ENSAMEG00000004373	-1.83558	5.13e-06
ENSAMEG00000017187	-1.8295	0.0309463
ENSAMEG00000016722	1.82861	0.00242829
ENSAMEG00000003558	1.82089	7.55e-07
ENSAMEG00000019893	-1.81972	0.00581922
ENSAMEG00000006269	1.81944	3.87e-05
ENSAMEG00000010042	1.81861	6.21e-07
ENSAMEG00000004370	1.81285	6.39e-05
ENSAMEG00000011041	1.81182	1.52e-06
ENSAMEG00000018846	1.80973	0.00566324
ENSAMEG00000009528	-1.80423	0.00183892
ENSAMEG00000012185	1.80382	1.35e-08
ENSAMEG00000013088	1.79479	0.0135677
ENSAMEG00000013468	1.79383	1.71e-06
ENSAMEG00000014851	1.79334	9.02e-06
ENSAMEG00000012271	1.78591	8.65e-06
ENSAMEG00000004019	1.78032	0.00576451
ENSAMEG00000015440	-1.77381	0.00401189
ENSAMEG00000003918	1.77165	3.68e-05
ENSAMEG00000015687	-1.77003	2.7e-06
ENSAMEG00000009894	1.76969	2.95e-09
ENSAMEG00000013966	1.7693	9.53e-06
ENSAMEG00000004852	1.76905	0.00152739
ENSAMEG00000011685	1.76767	8.43e-10
ENSAMEG00000007860	1.76761	0.0294578
ENSAMEG00000014751	1.76651	0.000665659
ENSAMEG00000008072	1.76517	1.98e-08
ENSAMEG00000007224	1.76454	1.41e-05
ENSAMEG00000000707	1.76017	7.53e-08
ENSAMEG00000006133	1.75908	0.000432034
ENSAMEG00000015184	1.75902	4.32e-05
ENSAMEG00000014908	1.75833	0.000211014
ENSAMEG00000009373	1.75587	0.00555767
ENSAMEG00000015740	-1.75574	0.0441882
ENSAMEG00000004537	1.75316	6.57e-08
ENSAMEG00000017771	1.75152	1.3e-09
ENSAMEG00000002343	1.74969	1.75e-05
ENSAMEG00000015933	1.74806	0.000126068
ENSAMEG00000016000	1.74785	0.00248749
ENSAMEG00000000007	1.74773	0.0118366
ENSAMEG00000023424	-1.74156	0.00752904
ENSAMEG00000013939	1.74055	4.03e-05
ENSAMEG00000019901	-1.73655	8.09e-08
ENSAMEG00000007370	-1.73483	0.00818247
ENSAMEG00000000625	1.73444	1.08e-05
ENSAMEG00000005983	1.73427	1.42e-10
ENSAMEG00000012722	1.73351	4.03e-05
ENSAMEG00000010952	-1.73278	0.0294578
ENSAMEG00000013117	1.73228	3.77e-06
ENSAMEG00000015255	1.72912	0.000637867
ENSAMEG00000013539	1.72911	0.000100383
ENSAMEG00000007025	1.72367	4.39e-08
ENSAMEG00000014408	1.72311	5.83e-05
ENSAMEG00000010820	1.7175	0.000405585
ENSAMEG00000018637	-1.71369	0.0121296
ENSAMEG00000003244	1.71345	1.66e-12
ENSAMEG00000002294	1.71123	0.00818247
ENSAMEG00000008594	1.71103	0.000461158
ENSAMEG00000015011	1.70815	6.39e-05
ENSAMEG00000001576	1.70619	0.00105944
ENSAMEG00000003580	1.70521	0.000405585
ENSAMEG00000000135	-1.70287	0.0447416
ENSAMEG00000003469	1.70225	0.00025772
ENSAMEG00000011386	1.70174	2.17e-05
ENSAMEG00000014854	1.69945	0.00295666
ENSAMEG00000010697	1.69734	0.0302857
ENSAMEG00000014316	1.69707	1.29e-06
ENSAMEG00000011710	1.69674	0.0290968
ENSAMEG00000009961	1.69624	6.57e-07
ENSAMEG00000007033	1.69576	0.0166255
ENSAMEG00000016990	1.691	0.00493738
ENSAMEG00000018909	1.68488	0.00582149
ENSAMEG00000011496	1.68267	2.99e-05
ENSAMEG00000008395	1.67413	0.0138543
ENSAMEG00000013059	1.66636	0.000711104
ENSAMEG00000011492	1.66622	0.00818247
ENSAMEG00000013155	1.66464	0.0224339
ENSAMEG00000011070	1.66422	6.23e-06
ENSAMEG00000014147	1.66106	0.00223092
ENSAMEG00000005906	1.65891	8.58e-08
ENSAMEG00000004028	1.6497	0.0458823
ENSAMEG00000016984	-1.64871	1.21e-06
ENSAMEG00000005418	1.64692	0.000351432
ENSAMEG00000015398	1.64564	2.28e-06
ENSAMEG00000008214	1.64421	2.13e-10
ENSAMEG00000004536	1.64358	2.62e-09
ENSAMEG00000003464	1.64332	1.51e-05
ENSAMEG00000019779	1.6431	2.23e-09
ENSAMEG00000009384	1.64208	0.0440638
ENSAMEG00000009988	1.6368	5.55e-05
ENSAMEG00000001705	1.63135	0.00990207
ENSAMEG00000015818	-1.62599	0.00656043
ENSAMEG00000000145	1.624	7.53e-06
ENSAMEG00000010766	1.6238	9.64e-08
ENSAMEG00000003906	1.61765	0.000157476
ENSAMEG00000003451	1.61751	5.74e-06
ENSAMEG00000015763	1.61517	1.48e-05
ENSAMEG00000017710	1.61294	5.44e-05
ENSAMEG00000000583	1.61109	0.000250398
ENSAMEG00000004413	1.60871	9.98e-08
ENSAMEG00000006988	1.60559	0.00620904
ENSAMEG00000022450	-1.60317	0.0053198
ENSAMEG00000015500	1.59778	3.64e-05
ENSAMEG00000016537	1.59774	0.0236733
ENSAMEG00000005712	1.59191	0.00304782
ENSAMEG00000019611	-1.59075	4.75e-05
ENSAMEG00000009319	1.58466	0.000126068
ENSAMEG00000007962	1.58419	2.37e-07
ENSAMEG00000001839	1.58092	3.87e-05
ENSAMEG00000019455	1.57948	0.000170315
ENSAMEG00000006876	-1.57652	0.0141521
ENSAMEG00000022887	-1.57415	0.0244365
ENSAMEG00000014898	1.57343	0.00185659
ENSAMEG00000017584	1.57193	1.44e-06
ENSAMEG00000020044	1.57019	1.03e-09
ENSAMEG00000019540	1.56892	5.35e-08
ENSAMEG00000001310	1.56757	0.00291978
ENSAMEG00000008055	1.56655	0.00091577
ENSAMEG00000011432	1.56262	0.00111593
ENSAMEG00000019130	1.56256	3.01e-06
ENSAMEG00000008210	1.55984	6.89e-07
ENSAMEG00000002591	1.55971	6.46e-07
ENSAMEG00000012187	1.55925	2.71e-05
ENSAMEG00000011280	1.55706	0.015697
ENSAMEG00000016152	1.55608	1.71e-06
ENSAMEG00000017531	1.55325	0.0032854
ENSAMEG00000009989	1.55116	0.00991277
ENSAMEG00000019628	1.54837	1.3e-06
ENSAMEG00000008606	1.5454	0.000591467
ENSAMEG00000000472	-1.54475	0.0167648
ENSAMEG00000015892	1.54427	0.00407047
ENSAMEG00000009564	1.54352	0.0307051
ENSAMEG00000014360	1.5427	0.028404
ENSAMEG00000011311	1.53957	1.13e-06
ENSAMEG00000014206	1.53923	0.000462323
ENSAMEG00000009744	1.53432	0.00022668
ENSAMEG00000011995	-1.53296	0.000793119
ENSAMEG00000020288	1.53186	0.00286376
ENSAMEG00000011473	1.531	4.21e-07
ENSAMEG00000023430	-1.52852	0.0108631
ENSAMEG00000012038	1.52807	0.000259232
ENSAMEG00000007365	1.52334	9.66e-08
ENSAMEG00000015706	1.52289	0.0359817
ENSAMEG00000012627	1.52109	0.0275106
ENSAMEG00000008264	1.5207	4.79e-06
ENSAMEG00000002982	1.51897	0.000536235
ENSAMEG00000023426	-1.5187	0.0254375
ENSAMEG00000011877	1.51868	1.42e-08
ENSAMEG00000011182	-1.51828	0.0107026
ENSAMEG00000013281	1.51566	0.0400559
ENSAMEG00000010063	1.51382	0.00205694
ENSAMEG00000019657	1.51361	0.00551303
ENSAMEG00000004914	1.51165	0.00455259
ENSAMEG00000011633	1.50795	0.00200387
ENSAMEG00000006398	1.50649	6.52e-09
ENSAMEG00000012255	1.50642	0.000461158
ENSAMEG00000002956	1.50612	2.23e-07
ENSAMEG00000001809	-1.50363	0.0158481
ENSAMEG00000005375	1.50252	0.00401729
ENSAMEG00000013424	1.49951	0.00445875
ENSAMEG00000019608	1.49901	0.00136607
ENSAMEG00000001324	1.49819	0.00536894
ENSAMEG00000018012	-1.49797	0.0386906
ENSAMEG00000014202	1.49792	0.000831487
ENSAMEG00000010215	-1.49763	0.00299076
ENSAMEG00000001429	1.49753	8.65e-06
ENSAMEG00000006788	1.49727	0.0005759
ENSAMEG00000011083	-1.49615	0.0102353
ENSAMEG00000018349	1.49605	0.000281181
ENSAMEG00000004268	1.4902	0.0352936
ENSAMEG00000018434	1.48823	5.19e-05
ENSAMEG00000003800	1.4851	0.00185682
ENSAMEG00000013678	1.48279	0.000918144
ENSAMEG00000003672	1.48008	1.48e-05
ENSAMEG00000005026	1.47972	0.000553444
ENSAMEG00000008196	1.47795	0.029113
ENSAMEG00000015584	1.47568	1.59e-05
ENSAMEG00000005431	1.47083	0.00365032
ENSAMEG00000008540	1.47026	1.91e-07
ENSAMEG00000015848	1.46711	0.00182236
ENSAMEG00000022708	-1.46691	0.00101316
ENSAMEG00000020677	-1.46592	0.00728236
ENSAMEG00000010168	1.46513	0.00728236
ENSAMEG00000016433	1.46459	0.000808978
ENSAMEG00000015068	1.46405	0.00138416
ENSAMEG00000004965	1.46363	1.22e-05
ENSAMEG00000015695	1.46184	0.0178455
ENSAMEG00000004497	1.46157	0.0024762
ENSAMEG00000010770	1.46009	0.0053198
ENSAMEG00000004148	1.45803	0.0079785
ENSAMEG00000003384	-1.45787	0.00113085
ENSAMEG00000011875	1.45686	0.000387332
ENSAMEG00000016480	1.45363	6.94e-07
ENSAMEG00000011563	1.44428	0.00186877
ENSAMEG00000016287	1.44413	7.45e-07
ENSAMEG00000009470	1.44181	7.04e-06
ENSAMEG00000014920	1.44001	2.11e-06
ENSAMEG00000004776	1.43998	0.00010932
ENSAMEG00000011387	1.43858	0.00706648
ENSAMEG00000003948	-1.43782	2.09e-05
ENSAMEG00000016495	1.43731	4.03e-06
ENSAMEG00000014122	1.43641	0.0160748
ENSAMEG00000005688	1.43086	4.75e-05
ENSAMEG00000004696	1.43037	1.8e-05
ENSAMEG00000017934	-1.42886	0.00838443
ENSAMEG00000002497	1.42746	0.000236119
ENSAMEG00000004243	1.42743	0.0174677
ENSAMEG00000020119	-1.4269	3.42e-06
ENSAMEG00000014274	1.42586	3.63e-05
ENSAMEG00000011520	1.42551	0.0212069
ENSAMEG00000008813	-1.42448	0.0234508
ENSAMEG00000005482	1.42396	0.00343061
ENSAMEG00000009207	1.42141	0.0122913
ENSAMEG00000019477	1.41856	0.000325572
ENSAMEG00000013351	1.41854	0.0487802
ENSAMEG00000023441	-1.41849	0.0257698
ENSAMEG00000018400	1.41263	8.85e-08
ENSAMEG00000004050	1.41238	0.00199058
ENSAMEG00000016401	1.40938	0.0124713
ENSAMEG00000009836	1.40872	6.34e-05
ENSAMEG00000001748	1.40783	0.0026922
ENSAMEG00000009209	1.4032	0.0441417
ENSAMEG00000001242	1.40166	2.98e-05
ENSAMEG00000000163	1.40165	0.00147793
ENSAMEG00000002655	-1.40153	0.0386565
ENSAMEG00000015013	-1.40069	0.0468299
ENSAMEG00000008890	1.39797	4.12e-05
ENSAMEG00000013591	1.39776	3.27e-05
ENSAMEG00000019420	1.39261	0.000106718
ENSAMEG00000011312	1.3924	0.00712678
ENSAMEG00000006910	1.38807	0.0076562
ENSAMEG00000015541	1.38754	0.000236119
ENSAMEG00000003397	-1.38712	0.0131246
ENSAMEG00000017487	1.38497	0.00198898
ENSAMEG00000018465	-1.38444	0.0130781
ENSAMEG00000003982	-1.3804	0.0247857
ENSAMEG00000009232	1.37978	0.00285501
ENSAMEG00000011004	1.37954	0.0186728
ENSAMEG00000011136	1.37948	0.00570644
ENSAMEG00000012856	1.37799	0.0112155
ENSAMEG00000021669	1.3769	0.0439073
ENSAMEG00000001191	-1.37025	0.00112506
ENSAMEG00000015841	1.36976	0.000940272
ENSAMEG00000015369	1.36836	0.00114908
ENSAMEG00000013205	1.36739	0.000390446
ENSAMEG00000011603	-1.36736	0.037293
ENSAMEG00000009132	1.36547	0.00185682
ENSAMEG00000016564	-1.36496	0.0246227
ENSAMEG00000002951	-1.3643	0.0362293
ENSAMEG00000008314	1.36345	0.0101582
ENSAMEG00000011428	1.36333	2.7e-06
ENSAMEG00000000287	1.3619	0.000103562
ENSAMEG00000002637	-1.36143	0.0492392
ENSAMEG00000003422	1.36111	0.00477337
ENSAMEG00000002550	-1.36049	0.0285259
ENSAMEG00000017542	1.36015	0.00582149
ENSAMEG00000001437	1.35832	0.00924622
ENSAMEG00000009498	1.3575	0.0316668
ENSAMEG00000008604	1.35727	0.0112155
ENSAMEG00000006046	1.35264	9.48e-06
ENSAMEG00000010837	1.35149	9.53e-06
ENSAMEG00000017066	1.35137	0.00584456
ENSAMEG00000001145	1.34959	2.61e-06
ENSAMEG00000009992	1.3494	0.00429902
ENSAMEG00000023455	-1.34924	0.0301854
ENSAMEG00000000167	1.34697	0.00967708
ENSAMEG00000011384	-1.34688	0.0224339
ENSAMEG00000011719	1.34605	0.0216237
ENSAMEG00000006801	1.33947	0.0295247
ENSAMEG00000003735	1.33813	0.0264604
ENSAMEG00000000345	1.33734	0.000230735
ENSAMEG00000010740	1.33704	0.00502825
ENSAMEG00000004859	-1.33573	0.0449878
ENSAMEG00000001071	1.33551	0.000138943
ENSAMEG00000018257	-1.33498	0.0189772
ENSAMEG00000005273	-1.33359	0.000307483
ENSAMEG00000020204	-1.33142	0.0189929
ENSAMEG00000004897	1.33121	0.0111362
ENSAMEG00000016820	1.33	0.0359817
ENSAMEG00000009927	1.32891	0.00151883
ENSAMEG00000013505	1.32633	0.0195817
ENSAMEG00000002181	-1.32531	0.0202048
ENSAMEG00000004743	1.32513	0.000741024
ENSAMEG00000010319	1.32307	0.00315203
ENSAMEG00000001564	1.32301	0.00196388
ENSAMEG00000015614	1.32135	0.0118366
ENSAMEG00000000812	1.31958	0.0345538
ENSAMEG00000002882	1.31957	0.000711637
ENSAMEG00000016660	1.31789	0.00286376
ENSAMEG00000000952	-1.31744	0.0152712
ENSAMEG00000008718	-1.3157	6.19e-05
ENSAMEG00000001507	1.31525	0.0129224
ENSAMEG00000015651	1.31045	0.00694667
ENSAMEG00000011920	1.31028	6.32e-07
ENSAMEG00000005503	-1.30911	0.0374632
ENSAMEG00000017619	1.30868	0.000199507
ENSAMEG00000017626	1.30813	0.0301854
ENSAMEG00000020225	1.30304	0.0418651
ENSAMEG00000014251	-1.30258	0.0273575
ENSAMEG00000008493	1.30018	0.000293647
ENSAMEG00000008425	1.2998	0.00302424
ENSAMEG00000016917	-1.29913	0.0299098
ENSAMEG00000016583	1.29822	4.69e-08
ENSAMEG00000015423	1.29781	0.00220011
ENSAMEG00000015758	-1.29597	0.0169507
ENSAMEG00000008060	-1.29381	0.0293301
ENSAMEG00000006010	1.29244	0.00118981
ENSAMEG00000015325	-1.29225	0.000499787
ENSAMEG00000015419	1.29007	2.48e-06
ENSAMEG00000008688	1.28866	0.00050913
ENSAMEG00000012460	1.28828	0.00439283
ENSAMEG00000004364	1.28825	0.0112155
ENSAMEG00000003780	1.2881	0.00818247
ENSAMEG00000021038	-1.28748	0.00251461
ENSAMEG00000011306	1.28526	0.0277964
ENSAMEG00000010608	1.28406	3.61e-05
ENSAMEG00000015775	1.28257	0.000457165
ENSAMEG00000009127	1.28051	0.00538387
ENSAMEG00000017051	1.27915	0.0199493
ENSAMEG00000002453	1.27895	0.00285501
ENSAMEG00000019052	-1.27697	0.0393078
ENSAMEG00000012600	1.27428	4.75e-05
ENSAMEG00000019880	1.27325	0.00620904
ENSAMEG00000000290	1.27311	0.000951652
ENSAMEG00000010747	-1.27274	0.00144626
ENSAMEG00000023228	-1.27271	0.0365684
ENSAMEG00000009938	1.27146	0.000742933
ENSAMEG00000011670	-1.27063	0.0262112
ENSAMEG00000008348	1.2704	0.000799455
ENSAMEG00000013936	1.26966	0.000163888
ENSAMEG00000013309	-1.26962	0.0474345
ENSAMEG00000006463	1.26927	1.15e-05
ENSAMEG00000016270	1.26857	0.00390484
ENSAMEG00000011834	1.26835	0.00144283
ENSAMEG00000002111	1.26814	0.0396432
ENSAMEG00000008284	-1.26642	0.000684662
ENSAMEG00000013398	-1.26624	0.00591772
ENSAMEG00000015548	1.26484	0.0226491
ENSAMEG00000013672	1.26195	0.00014782
ENSAMEG00000010451	1.26184	0.000469327
ENSAMEG00000008520	1.26018	0.00302424
ENSAMEG00000003283	1.25767	6.98e-06
ENSAMEG00000000469	1.25764	0.00072871
ENSAMEG00000008968	1.25655	0.000373272
ENSAMEG00000017893	1.25552	1.14e-06
ENSAMEG00000003180	1.2544	0.037597
ENSAMEG00000003857	1.2533	7.59e-05
ENSAMEG00000010258	1.253	0.00171148
ENSAMEG00000010051	1.25153	8.91e-08
ENSAMEG00000016978	1.25059	0.0316832
ENSAMEG00000004878	-1.24839	0.015874
ENSAMEG00000017959	1.24737	0.0199493
ENSAMEG00000006490	1.24582	0.0191714
ENSAMEG00000017155	1.24569	0.00358793
ENSAMEG00000007965	1.2442	0.00296347
ENSAMEG00000018064	1.24333	3.3e-07
ENSAMEG00000017579	1.24194	0.0024113
ENSAMEG00000017267	1.2397	0.00551303
ENSAMEG00000006782	1.2392	0.00811926
ENSAMEG00000020720	-1.23863	8.26e-05
ENSAMEG00000018103	1.23371	0.000275929
ENSAMEG00000007415	1.23143	0.00955537
ENSAMEG00000001109	1.23093	0.0190167
ENSAMEG00000009271	1.23033	0.00167003
ENSAMEG00000008556	-1.22963	0.0309463
ENSAMEG00000004184	1.22939	0.00189761
ENSAMEG00000003866	1.22934	0.00219981
ENSAMEG00000014607	-1.2268	0.0337271
ENSAMEG00000009312	1.22585	0.0193949
ENSAMEG00000006087	-1.22434	0.0331964
ENSAMEG00000006632	1.22425	0.0387587
ENSAMEG00000000739	-1.22017	0.0478307
ENSAMEG00000003236	1.21991	0.0234857
ENSAMEG00000001885	1.21781	0.00777077
ENSAMEG00000016171	1.21636	0.0195979
ENSAMEG00000002596	-1.21426	0.0325634
ENSAMEG00000008322	-1.21291	2.86e-06
ENSAMEG00000000859	-1.21171	0.0350897
ENSAMEG00000005558	-1.21117	0.00227761
ENSAMEG00000015116	1.21062	0.00135508
ENSAMEG00000015378	1.21015	0.0248735
ENSAMEG00000012818	1.20915	0.043093
ENSAMEG00000005768	1.20843	0.000303219
ENSAMEG00000009670	-1.20633	0.00135021
ENSAMEG00000012644	1.20531	0.0399953
ENSAMEG00000009813	-1.20505	0.0128474
ENSAMEG00000015600	1.20205	0.000323637
ENSAMEG00000015545	1.20054	0.0294958
ENSAMEG00000020034	1.20036	0.000456029
ENSAMEG00000016147	1.19991	0.0340229
ENSAMEG00000015024	-1.1985	0.0061676
ENSAMEG00000003445	1.19804	0.0017664
ENSAMEG00000004245	1.19789	0.0122913
ENSAMEG00000005443	1.19771	0.000166483
ENSAMEG00000011321	1.19728	0.0133967
ENSAMEG00000017037	-1.1968	0.0397782
ENSAMEG00000002033	1.1967	0.00577688
ENSAMEG00000010853	1.19662	0.00480826
ENSAMEG00000015277	1.19586	0.0103729
ENSAMEG00000012658	1.19512	0.000241806
ENSAMEG00000013304	-1.19455	0.0439073
ENSAMEG00000010025	-1.19452	2.03e-06
ENSAMEG00000007040	1.19392	0.00132392
ENSAMEG00000000602	1.19322	0.0465518
ENSAMEG00000012294	1.19311	0.00869911
ENSAMEG00000003155	-1.19268	0.00483159
ENSAMEG00000008547	1.19114	0.000553674
ENSAMEG00000014690	-1.19081	0.0272373
ENSAMEG00000016770	1.19054	0.000686305
ENSAMEG00000007093	1.19032	0.00171148
ENSAMEG00000016549	-1.1903	0.00105146
ENSAMEG00000013656	-1.18911	0.0027452
ENSAMEG00000013141	1.18572	0.00845848
ENSAMEG00000000364	1.18142	0.00393145
ENSAMEG00000019845	1.18125	0.0238384
ENSAMEG00000012042	1.17986	0.000337819
ENSAMEG00000014876	1.17943	0.000126068
ENSAMEG00000017687	1.17883	0.000254277
ENSAMEG00000013627	1.17879	0.000426801
ENSAMEG00000001893	1.17624	2.64e-06
ENSAMEG00000002055	1.17578	0.000207165
ENSAMEG00000003889	-1.17519	0.0478047
ENSAMEG00000011589	-1.17339	0.00105944
ENSAMEG00000019881	-1.17207	0.00042073
ENSAMEG00000002501	1.16998	0.00081365
ENSAMEG00000012768	1.16936	0.000221977
ENSAMEG00000014819	1.1688	0.000910875
ENSAMEG00000015822	1.16854	0.00148842
ENSAMEG00000010843	1.16718	0.0344242
ENSAMEG00000013503	1.16559	0.000231082
ENSAMEG00000014675	1.16542	0.0239824
ENSAMEG00000014263	1.16517	0.00809923
ENSAMEG00000014508	1.16376	0.0168735
ENSAMEG00000000340	1.16259	0.00346779
ENSAMEG00000016340	-1.16122	0.0267571
ENSAMEG00000015914	1.1611	0.00678164
ENSAMEG00000019422	-1.15943	0.0350897
ENSAMEG00000005728	1.15752	0.00566324
ENSAMEG00000017448	1.15643	0.00171713
ENSAMEG00000004920	1.15508	0.000940328
ENSAMEG00000003120	1.15496	0.0336146
ENSAMEG00000000328	1.15361	0.000860073
ENSAMEG00000012993	1.1533	0.00967652
ENSAMEG00000014615	1.15298	0.00609142
ENSAMEG00000008456	1.15261	0.000604866
ENSAMEG00000016115	1.15204	0.00492781
ENSAMEG00000008682	1.15056	0.000559528
ENSAMEG00000017832	1.14942	1.05e-05
ENSAMEG00000002642	1.14887	0.00193648
ENSAMEG00000019039	-1.14722	0.0192611
ENSAMEG00000001872	-1.14576	0.0270973
ENSAMEG00000018832	1.14534	0.0231798
ENSAMEG00000010365	1.14381	0.00209766
ENSAMEG00000017367	1.14293	0.00153029
ENSAMEG00000000491	1.14258	0.00297697
ENSAMEG00000015632	-1.14206	0.0228563
ENSAMEG00000013186	1.13713	0.000430258
ENSAMEG00000018379	1.13708	0.00694667
ENSAMEG00000005021	1.13666	0.022147
ENSAMEG00000018167	1.13656	0.0118366
ENSAMEG00000002827	1.13654	0.000469327
ENSAMEG00000011677	-1.13648	0.000901663
ENSAMEG00000009635	1.13621	0.0387535
ENSAMEG00000013197	1.13605	0.000778071
ENSAMEG00000005545	1.13511	0.0174677
ENSAMEG00000010733	1.13505	0.0215779
ENSAMEG00000003650	-1.1348	0.0231792
ENSAMEG00000011773	1.13269	0.00329413
ENSAMEG00000002974	1.1324	0.0122913
ENSAMEG00000007768	1.13225	0.00342973
ENSAMEG00000015544	1.13205	0.000287239
ENSAMEG00000007115	1.13104	0.0293301
ENSAMEG00000009088	-1.13101	0.0377831
ENSAMEG00000011350	-1.13078	0.0224578
ENSAMEG00000010932	1.12882	0.000307483
ENSAMEG00000019748	-1.12714	0.0139349
ENSAMEG00000005488	1.12557	0.00607952
ENSAMEG00000004827	-1.12541	0.0187236
ENSAMEG00000018399	1.12504	0.000809084
ENSAMEG00000018275	1.12412	0.000405585
ENSAMEG00000000093	-1.12343	0.0260081
ENSAMEG00000015779	1.1234	0.0118366
ENSAMEG00000005584	1.11864	0.00424988
ENSAMEG00000005015	1.11536	6.56e-06
ENSAMEG00000012431	-1.1148	0.0332953
ENSAMEG00000009654	-1.11409	0.0131052
ENSAMEG00000011456	-1.11037	0.0481045
ENSAMEG00000008383	1.10707	0.00454716
ENSAMEG00000003935	1.10583	0.000166483
ENSAMEG00000002740	1.10454	0.0212234
ENSAMEG00000015466	1.10441	0.0348889
ENSAMEG00000011827	1.10425	0.0106652
ENSAMEG00000002082	1.10335	0.005415
ENSAMEG00000009116	-1.10292	0.0367371
ENSAMEG00000011799	1.10221	0.0482106
ENSAMEG00000001463	1.10004	0.0027595
ENSAMEG00000013589	-1.09929	0.00344316
ENSAMEG00000004428	1.09897	0.00200387
ENSAMEG00000008165	1.09851	0.0103715
ENSAMEG00000022659	-1.09823	0.030371
ENSAMEG00000007902	1.09746	0.0238384
ENSAMEG00000009241	-1.09707	0.0135496
ENSAMEG00000004979	1.09701	0.000146855
ENSAMEG00000002845	1.09683	5.83e-05
ENSAMEG00000014655	1.09591	0.0145667
ENSAMEG00000008331	1.09557	0.0439073
ENSAMEG00000001308	1.09444	0.00114908
ENSAMEG00000008121	1.09311	0.0445002
ENSAMEG00000015774	1.09171	0.00976161
ENSAMEG00000002908	1.08825	0.0359115
ENSAMEG00000015575	1.08792	0.00450189
ENSAMEG00000014570	1.0861	1.31e-05
ENSAMEG00000011847	1.08515	0.00729867
ENSAMEG00000009196	-1.08431	0.0490653
ENSAMEG00000001331	-1.08348	0.0269071
ENSAMEG00000005236	-1.08285	0.00237
ENSAMEG00000018633	1.08226	0.0052474
ENSAMEG00000003863	-1.0793	0.00275918
ENSAMEG00000007501	1.07863	0.00424459
ENSAMEG00000001073	1.07747	0.000701338
ENSAMEG00000003163	1.07342	0.00131764
ENSAMEG00000016478	1.07325	0.00115549
ENSAMEG00000015769	-1.07285	0.0422221
ENSAMEG00000015699	1.07195	0.00163291
ENSAMEG00000011750	1.06897	0.0267571
ENSAMEG00000010524	-1.06847	0.0124713
ENSAMEG00000009034	1.06741	3.21e-05
ENSAMEG00000005453	1.0663	0.00982347
ENSAMEG00000004212	1.06624	0.0412328
ENSAMEG00000013114	1.06457	0.010068
ENSAMEG00000012778	1.06395	0.0224849
ENSAMEG00000003148	1.06156	0.00295666
ENSAMEG00000003940	1.06095	3.81e-05
ENSAMEG00000018433	1.06073	0.0212258
ENSAMEG00000012668	1.06051	0.000791169
ENSAMEG00000006933	1.06033	0.0337271
ENSAMEG00000014738	1.06004	0.0244229
ENSAMEG00000014187	-1.05964	0.0150276
ENSAMEG00000005779	1.05938	0.0370607
ENSAMEG00000016908	1.05926	0.0484877
ENSAMEG00000005657	1.05855	0.000933277
ENSAMEG00000011261	1.05847	0.0245559
ENSAMEG00000003250	-1.05317	0.02442
ENSAMEG00000006318	1.05167	0.0326474
ENSAMEG00000014027	-1.04976	0.0348889
ENSAMEG00000019957	-1.04933	0.00349683
ENSAMEG00000015332	-1.04877	0.023496
ENSAMEG00000008179	-1.04744	0.0378172
ENSAMEG00000009842	-1.0469	0.00250874
ENSAMEG00000003380	1.04627	0.0396881
ENSAMEG00000007786	1.04554	0.0367371
ENSAMEG00000005299	-1.04169	0.0345538
ENSAMEG00000017660	1.03899	0.0131246
ENSAMEG00000011956	1.03775	0.0320866
ENSAMEG00000010516	1.03484	0.0484877
ENSAMEG00000015363	-1.034	0.0262112
ENSAMEG00000017374	1.03395	0.00620904
ENSAMEG00000009179	1.03282	0.0224578
ENSAMEG00000008719	1.03197	0.0370628
ENSAMEG00000004567	1.02936	0.0090272
ENSAMEG00000012928	1.02931	0.0061676
ENSAMEG00000003030	1.02923	0.00180457
ENSAMEG00000015788	1.02776	0.0118366
ENSAMEG00000010286	1.02775	0.0118366
ENSAMEG00000004446	1.02503	0.0478307
ENSAMEG00000010065	1.02416	0.00304822
ENSAMEG00000014628	1.02362	0.0151112
ENSAMEG00000020095	-1.02136	0.0256081
ENSAMEG00000013385	1.01923	0.0479496
ENSAMEG00000006998	1.01922	0.00304782
ENSAMEG00000010225	1.01735	0.00224503
ENSAMEG00000009529	-1.01565	0.0199887
ENSAMEG00000001724	1.0151	0.00259247
ENSAMEG00000015405	1.01403	0.0262112
ENSAMEG00000016108	1.01276	0.0273917
ENSAMEG00000003840	-1.01225	0.0151109
ENSAMEG00000010957	-1.01124	0.0356583
ENSAMEG00000001631	1.01027	0.0333381
ENSAMEG00000013146	1.00829	0.00493462
ENSAMEG00000018435	-1.00742	0.0421078
ENSAMEG00000017224	1.0071	0.0107548
ENSAMEG00000020030	1.00628	0.00162594
ENSAMEG00000011959	1.00622	0.0493141
ENSAMEG00000000275	1.00609	0.0082637
ENSAMEG00000013999	-1.00481	0.00711547
ENSAMEG00000013238	1.00476	0.000579762
ENSAMEG00000005841	1.00418	0.0127424
ENSAMEG00000009554	1.00298	0.0481348
ENSAMEG00000005596	-1.00249	0.016406
ENSAMEG00000016057	1.00198	2.46e-05
ENSAMEG00000007756	1.00187	0.0111362
ENSAMEG00000013032	1.00144	0.0146644
ENSAMEG00000012599	1.00072	0.0232328
ENSAMEG00000006407	1.00032	0.0118976
ENSAMEG00000016079	1.0003	0.0101582
ENSAMEG00000013488	0.999048	0.000777696
ENSAMEG00000004299	0.997191	0.0491016
ENSAMEG00000000486	-0.997095	0.00205117
ENSAMEG00000011310	0.996137	0.0273917
ENSAMEG00000018884	-0.996068	0.0337271
ENSAMEG00000015756	-0.995536	0.0112155
ENSAMEG00000015717	0.993768	0.0421078
ENSAMEG00000019438	-0.993421	0.0252388
ENSAMEG00000003668	-0.990778	0.0304759
ENSAMEG00000016655	0.990521	0.00467862
ENSAMEG00000009699	-0.989071	0.0422856
ENSAMEG00000007909	0.988986	0.0172322
ENSAMEG00000012340	0.986955	0.00772098
ENSAMEG00000009588	0.985478	0.0388303
ENSAMEG00000006653	0.983669	0.0359115
ENSAMEG00000006492	0.983515	0.00582149
ENSAMEG00000016047	-0.982637	0.0112155
ENSAMEG00000005840	0.982251	0.0299806
ENSAMEG00000007561	0.981276	0.000944502
ENSAMEG00000013225	0.980267	0.00398804
ENSAMEG00000005053	0.978286	0.00260014
ENSAMEG00000001845	0.977508	0.0247271
ENSAMEG00000008073	0.977129	0.0453019
ENSAMEG00000009031	-0.97536	0.0490588
ENSAMEG00000021083	-0.973524	0.0425243
ENSAMEG00000007202	0.972466	0.0303483
ENSAMEG00000001799	-0.971654	0.0130226
ENSAMEG00000013223	0.970784	0.0470531
ENSAMEG00000014965	0.970245	0.0410897
ENSAMEG00000009205	0.969928	0.0194624
ENSAMEG00000010282	0.969803	0.0320866
ENSAMEG00000016447	-0.96952	0.0412934
ENSAMEG00000002528	0.968654	0.0375891
ENSAMEG00000006427	-0.968591	0.0235245
ENSAMEG00000015672	0.968352	0.0155037
ENSAMEG00000015249	0.968109	0.000110911
ENSAMEG00000003389	0.965367	0.00175377
ENSAMEG00000007589	0.965281	0.00455259
ENSAMEG00000003405	-0.9644	0.0186728
ENSAMEG00000017472	0.963222	0.0439073
ENSAMEG00000001040	0.960987	0.00180457
ENSAMEG00000017397	-0.960918	0.00401079
ENSAMEG00000003016	-0.960096	0.0182933
ENSAMEG00000010649	0.958613	0.0173275
ENSAMEG00000002182	-0.957711	0.0414349
ENSAMEG00000003755	0.957224	0.048939
ENSAMEG00000008237	0.956279	0.00532697
ENSAMEG00000016385	0.956019	0.00804499
ENSAMEG00000016038	-0.953463	0.0460676
ENSAMEG00000013597	0.952525	0.00515745
ENSAMEG00000019907	0.951666	0.0198564
ENSAMEG00000005210	-0.951596	0.00256714
ENSAMEG00000007161	0.949942	0.0220061
ENSAMEG00000000983	0.949604	0.00204991
ENSAMEG00000009642	-0.949015	0.0367371
ENSAMEG00000017855	0.94875	0.0388303
ENSAMEG00000017384	-0.948045	0.0254375
ENSAMEG00000017420	0.947551	0.00279248
ENSAMEG00000013147	0.946582	0.00178823
ENSAMEG00000016191	0.944778	0.00729867
ENSAMEG00000014840	0.943984	0.0082637
ENSAMEG00000008712	0.942549	0.00447766
ENSAMEG00000003664	0.942014	0.00711547
ENSAMEG00000013002	-0.941456	0.000794174
ENSAMEG00000008578	0.941266	0.0445002
ENSAMEG00000010621	-0.940576	0.0345538
ENSAMEG00000007316	0.938051	0.00171071
ENSAMEG00000007868	0.936547	0.00657299
ENSAMEG00000000144	0.936453	0.0117152
ENSAMEG00000001133	-0.935487	0.0375298
ENSAMEG00000003197	0.932691	0.0114271
ENSAMEG00000004874	0.931304	0.00240141
ENSAMEG00000005854	0.930749	0.00275435
ENSAMEG00000016860	-0.930376	0.0345538
ENSAMEG00000008780	0.929933	0.0463744
ENSAMEG00000019636	-0.928553	0.00196388
ENSAMEG00000011315	0.927483	0.0397455
ENSAMEG00000013658	0.927118	0.0337397
ENSAMEG00000004541	0.926939	0.0093528
ENSAMEG00000007695	0.926923	0.0126171
ENSAMEG00000015885	0.926799	0.0364789
ENSAMEG00000013335	0.923661	0.0061905
ENSAMEG00000005071	0.923546	0.0101582
ENSAMEG00000007239	0.923459	0.00833377
ENSAMEG00000008255	-0.923417	0.00365032
ENSAMEG00000002954	0.923373	0.0183336
ENSAMEG00000005592	0.92262	0.0124339
ENSAMEG00000003488	-0.922521	0.0447416
ENSAMEG00000017057	0.921676	0.00273129
ENSAMEG00000007566	0.920945	0.0194186
ENSAMEG00000012353	0.920839	0.0359817
ENSAMEG00000010890	0.9193	0.0496401
ENSAMEG00000004241	0.91924	0.0320734
ENSAMEG00000018205	0.919237	0.00447547
ENSAMEG00000009983	0.919168	0.032667
ENSAMEG00000008074	0.918842	0.0138787
ENSAMEG00000003970	-0.91866	0.0341036
ENSAMEG00000015741	-0.918224	0.0492392
ENSAMEG00000007363	0.917949	0.000739556
ENSAMEG00000001080	0.91572	0.012458
ENSAMEG00000016912	-0.914878	0.0268273
ENSAMEG00000001283	0.914674	0.00613371
ENSAMEG00000013201	0.914241	0.0398512
ENSAMEG00000013015	0.914032	0.02866
ENSAMEG00000008627	0.913205	0.00818247
ENSAMEG00000013263	0.911674	0.0387535
ENSAMEG00000002985	-0.911618	0.020834
ENSAMEG00000016751	0.91103	0.00185345
ENSAMEG00000008668	0.908574	0.0249514
ENSAMEG00000003703	0.908334	0.0332181
ENSAMEG00000008919	0.90582	0.0150712
ENSAMEG00000007542	0.905329	0.0467341
ENSAMEG00000011686	0.90502	0.0406403
ENSAMEG00000007296	0.904734	0.0306833
ENSAMEG00000018000	0.90295	0.0365684
ENSAMEG00000009557	0.901348	0.00127955
ENSAMEG00000005249	0.901343	0.0110153
ENSAMEG00000000149	-0.899337	0.047053
ENSAMEG00000007145	0.899027	0.00749392
ENSAMEG00000013688	-0.898162	0.010567
ENSAMEG00000007382	0.896466	0.00766064
ENSAMEG00000013596	0.896084	0.0157838
ENSAMEG00000009685	0.894555	0.043384
ENSAMEG00000009161	0.893232	0.0373167
ENSAMEG00000004526	-0.893025	0.00349683
ENSAMEG00000014665	0.891377	0.0228563
ENSAMEG00000003718	0.888224	0.00842777
ENSAMEG00000008635	0.885886	0.00655902
ENSAMEG00000012950	0.88553	0.00461067
ENSAMEG00000015603	0.884298	0.00508366
ENSAMEG00000001994	0.883094	0.00193202
ENSAMEG00000017184	0.882655	0.003423
ENSAMEG00000009944	-0.882036	0.00657299
ENSAMEG00000000733	-0.880302	0.00260014
ENSAMEG00000009709	0.880169	0.000466529
ENSAMEG00000018155	-0.879232	0.0484877
ENSAMEG00000013048	0.878252	0.0112155
ENSAMEG00000012433	-0.877795	0.00289001
ENSAMEG00000009072	0.873813	0.0342066
ENSAMEG00000009315	-0.873722	0.043185
ENSAMEG00000012487	0.872851	0.0236733
ENSAMEG00000001729	-0.872361	0.00011237
ENSAMEG00000012662	0.871581	0.0366772
ENSAMEG00000002285	0.871253	0.0474345
ENSAMEG00000000171	0.869972	0.0123543
ENSAMEG00000006371	0.86991	0.0240631
ENSAMEG00000001841	0.867839	0.0396996
ENSAMEG00000011925	-0.866102	0.00869944
ENSAMEG00000004735	0.866044	0.00893319
ENSAMEG00000006867	0.864114	0.000359061
ENSAMEG00000006190	0.861003	0.049195
ENSAMEG00000015225	0.860533	0.0222332
ENSAMEG00000003359	-0.858268	0.0357858
ENSAMEG00000014230	0.85806	0.0224339
ENSAMEG00000007499	0.856911	0.0338291
ENSAMEG00000022343	-0.854082	0.0065671
ENSAMEG00000007416	0.852762	0.00723961
ENSAMEG00000001195	-0.851499	0.0189521
ENSAMEG00000005635	0.851102	0.0158481
ENSAMEG00000013477	0.849287	0.037293
ENSAMEG00000007651	0.848893	0.00804739
ENSAMEG00000007212	0.847401	0.0415666
ENSAMEG00000013377	-0.847365	0.0365684
ENSAMEG00000013399	0.847081	0.0267571
ENSAMEG00000012155	0.839027	0.0291307
ENSAMEG00000012366	0.838834	0.00730524
ENSAMEG00000000170	0.836693	0.00508742
ENSAMEG00000002124	0.835711	0.0107253
ENSAMEG00000011138	-0.835227	0.0316976
ENSAMEG00000001578	-0.833418	0.0439073
ENSAMEG00000002373	-0.832975	0.0444429
ENSAMEG00000017628	-0.830944	0.00688951
ENSAMEG00000011080	-0.830337	0.0223629
ENSAMEG00000016345	0.830262	0.0422221
ENSAMEG00000006250	0.828277	0.0237915
ENSAMEG00000016814	-0.826616	0.0293301
ENSAMEG00000004292	0.82519	0.00311389
ENSAMEG00000011522	0.825132	0.0046747
ENSAMEG00000006428	0.823259	0.0415666
ENSAMEG00000002700	0.822667	0.0112155
ENSAMEG00000010083	0.821442	0.0224461
ENSAMEG00000002469	0.818135	0.0338645
ENSAMEG00000011912	-0.81425	0.00749392
ENSAMEG00000005329	-0.814096	0.021352
ENSAMEG00000007684	-0.814072	0.0315269
ENSAMEG00000013710	0.813916	0.00917372
ENSAMEG00000000820	-0.81249	0.0224578
ENSAMEG00000016221	-0.812444	0.0325634
ENSAMEG00000006229	0.812149	0.00363822
ENSAMEG00000014995	-0.810764	0.0168735
ENSAMEG00000003087	-0.810701	0.0429308
ENSAMEG00000006942	0.809271	0.00976224
ENSAMEG00000004705	-0.808725	0.0053302
ENSAMEG00000002787	-0.808611	0.00251159
ENSAMEG00000007210	0.807462	0.0488102
ENSAMEG00000019612	0.801948	0.0481348
ENSAMEG00000017022	0.801239	0.0365684
ENSAMEG00000019977	-0.800032	0.0403466
ENSAMEG00000015082	-0.799827	0.0284695
ENSAMEG00000008787	0.799595	0.0137273
ENSAMEG00000018348	-0.798542	0.00789153
ENSAMEG00000015854	-0.795972	0.0218622
ENSAMEG00000020000	0.794883	0.0410549
ENSAMEG00000014578	0.792588	0.0496401
ENSAMEG00000016443	0.792521	0.0316668
ENSAMEG00000014305	-0.79106	0.00772859
ENSAMEG00000008534	-0.790013	0.0176706
ENSAMEG00000017299	0.789805	0.00210535
ENSAMEG00000002370	-0.788985	0.0361135
ENSAMEG00000013484	0.788137	0.01564
ENSAMEG00000016980	0.786132	0.0204404
ENSAMEG00000008692	0.785749	0.0336975
ENSAMEG00000007636	-0.7857	0.0399984
ENSAMEG00000012023	0.785448	0.00147134
ENSAMEG00000018436	0.782576	0.0295247
ENSAMEG00000014724	0.780037	0.0110923
ENSAMEG00000011539	-0.776996	0.00492755
ENSAMEG00000010839	0.776403	0.0474345
ENSAMEG00000006438	-0.775742	0.0142152
ENSAMEG00000015087	0.772818	0.0149556
ENSAMEG00000008248	0.771933	0.0369816
ENSAMEG00000015274	0.769894	0.0276299
ENSAMEG00000009920	-0.768152	0.0397782
ENSAMEG00000005622	-0.767729	0.0266042
ENSAMEG00000011681	0.767319	0.0248735
ENSAMEG00000000379	0.765996	0.00286376
ENSAMEG00000010551	-0.764971	0.0334309
ENSAMEG00000008239	0.762734	0.0397983
ENSAMEG00000004417	0.762412	0.0162219
ENSAMEG00000011555	0.762206	0.0356583
ENSAMEG00000009145	0.757239	0.00875998
ENSAMEG00000018115	0.754666	0.0219623
ENSAMEG00000017812	0.754663	0.0447416
ENSAMEG00000010074	-0.754053	0.0400559
ENSAMEG00000003255	0.747383	0.00461067
ENSAMEG00000000327	-0.743355	0.0249799
ENSAMEG00000012429	-0.742894	0.0228212
ENSAMEG00000005145	0.742101	0.0474345
ENSAMEG00000011236	-0.741821	0.0439073
ENSAMEG00000010950	0.740653	0.0458823
ENSAMEG00000015705	-0.740524	0.0478047
ENSAMEG00000008956	0.740254	0.0459103
ENSAMEG00000008814	0.737666	0.0390817
ENSAMEG00000015003	-0.733557	0.0365684
ENSAMEG00000005104	0.733493	0.0192611
ENSAMEG00000007074	-0.73187	0.0156923
ENSAMEG00000004481	0.73163	0.0295055
ENSAMEG00000013325	0.731281	0.0196132
ENSAMEG00000003846	0.729095	0.0175994
ENSAMEG00000014626	-0.727411	0.0196132
ENSAMEG00000005122	-0.727276	0.0327467
ENSAMEG00000009262	0.726032	0.0346327
ENSAMEG00000012522	0.722126	0.0427707
ENSAMEG00000005572	0.721311	0.0224849
ENSAMEG00000017672	-0.718473	0.0196519
ENSAMEG00000001806	0.715921	0.0334309
ENSAMEG00000017813	0.714677	0.0451204
ENSAMEG00000013330	-0.713654	0.0439073
ENSAMEG00000001246	-0.712601	0.0249296
ENSAMEG00000011781	0.712097	0.0170654
ENSAMEG00000015341	0.708743	0.0447416
ENSAMEG00000009233	-0.707443	0.0451204
ENSAMEG00000000268	0.704057	0.0440751
ENSAMEG00000008045	0.703263	0.0299806
ENSAMEG00000017975	0.701669	0.0182021
ENSAMEG00000001478	0.70001	0.048939
ENSAMEG00000005693	0.699728	0.0432809
ENSAMEG00000011392	0.698152	0.0410897
ENSAMEG00000004913	0.694509	0.0415666
ENSAMEG00000008480	0.691835	0.0310314
ENSAMEG00000015637	0.689872	0.0357294
ENSAMEG00000000078	0.689474	0.0350897
ENSAMEG00000001760	-0.688443	0.0388042
ENSAMEG00000015163	-0.687375	0.0169233
ENSAMEG00000011586	-0.687077	0.0356385
ENSAMEG00000008289	0.684661	0.0391722
ENSAMEG00000001116	-0.684316	0.0387535
ENSAMEG00000008347	0.684179	0.0496401
ENSAMEG00000011086	0.683787	0.013156
ENSAMEG00000014640	0.683703	0.0325634
ENSAMEG00000002939	-0.682647	0.0163709
ENSAMEG00000002695	0.680473	0.0359115
ENSAMEG00000000996	0.679784	0.0325634
ENSAMEG00000004884	-0.679775	0.0485999
ENSAMEG00000013379	0.679058	0.0421078
ENSAMEG00000013312	0.678214	0.0370432
ENSAMEG00000003200	0.678056	0.036013
ENSAMEG00000012136	-0.676766	0.0418164
ENSAMEG00000003299	-0.675406	0.0288762
ENSAMEG00000004772	0.674506	0.0496401
ENSAMEG00000011528	-0.672923	0.0364085
ENSAMEG00000002921	0.672717	0.0467341
ENSAMEG00000007533	0.671129	0.0107026
ENSAMEG00000004701	0.670609	0.0340975
ENSAMEG00000004403	0.668366	0.0336146
ENSAMEG00000007519	0.667594	0.0463115
ENSAMEG00000017903	0.666564	0.0182974
ENSAMEG00000009078	0.665201	0.0304759
ENSAMEG00000016200	-0.663036	0.0107078
ENSAMEG00000013341	-0.66201	0.0462464
ENSAMEG00000015395	-0.661896	0.0482106
ENSAMEG00000005933	0.661363	0.0338645
ENSAMEG00000020123	-0.660447	0.0488102
ENSAMEG00000006924	0.659559	0.013716
ENSAMEG00000007608	0.65741	0.00865554
ENSAMEG00000016150	-0.655562	0.0333771
ENSAMEG00000001353	-0.653984	0.0329139
ENSAMEG00000001298	0.650879	0.0342414
ENSAMEG00000008063	0.649873	0.0232328
ENSAMEG00000002345	-0.649599	0.0441882
ENSAMEG00000018218	-0.647622	0.0319759
ENSAMEG00000008206	-0.647196	0.023732
ENSAMEG00000003917	0.646408	0.0421078
ENSAMEG00000005096	0.645414	0.0432576
ENSAMEG00000003379	-0.644593	0.0427178
ENSAMEG00000016636	0.640878	0.0224339
ENSAMEG00000007294	0.640549	0.0329096
ENSAMEG00000000085	-0.638321	0.037293
ENSAMEG00000019741	-0.625392	0.0327335
ENSAMEG00000002406	0.625163	0.0447541
ENSAMEG00000015890	0.624233	0.0241343
ENSAMEG00000014051	0.620251	0.0410549
ENSAMEG00000004613	0.617378	0.0236733
ENSAMEG00000003103	0.617277	0.0462464
ENSAMEG00000006130	0.613536	0.0403051
ENSAMEG00000016196	-0.610767	0.0445002
ENSAMEG00000015519	0.596875	0.0439073
ENSAMEG00000017105	0.595267	0.036364
ENSAMEG00000004458	-0.595154	0.0412934
ENSAMEG00000015392	0.578902	0.0348889
ENSAMEG00000005812	-0.553411	0.0407274
