# Supplementary material for: Immune profiles of male giant panda (Ailuropoda melanoleuca) during the breeding season
Source: BMC Genomics. 2021 Feb 28;22:143. doi: 10.1186/s12864-021-07456-x (PMC7916315; doi:10.1186/s12864-021-07456-x)
Supplement: Supplementary file 3 — Additional file 3: Table S3. The score of 36 genes calculated by topological analysis methods. The table contains five columns, including Gene Symbol, Radiality, Betweenness, Closeness, and Degree. [file 12864_2021_7456_MOESM3_ESM.xlsx]

## Sheet: Sheet1
Gene Symbol	Radiality	Betweenness	Closeness	Degree
HSPA4	8.13506	630.838	19.15	9
SUGT1	7.9013	341.057	17.4833	8
SOD1	7.76104	330.8	15.3762	4
IL1B	7.73766	299	15.6595	5
PSMC2	7.71429	212.9	16.35	7
HSP90B1	7.69091	69.6238	15.2333	5
HSP90AA1	7.69091	69.6238	15.2333	5
HSPA8	7.69091	23.9714	15.65	6
TXN	7.5974	38.2	14.4095	4
HSP90AB1	7.52727	0	13.6833	3
ADCY6	7.43377	239.419	13.5595	3
BECN1	7.41039	371	14.8345	6
HMGB1	7.31688	70	12.8345	2
PSMA4	7.31688	44.5667	14.5429	6
CALM2	7.24675	120.3	13.0929	4
PSMB7	7.01299	0.5	12.8524	5
PSMD7	7.01299	0.5	12.8524	5
PRDX5	7.01299	0	11.3179	2
IL15	6.98961	68	11.3679	2
PSME1	6.98961	0	12.3524	4
PSMD6	6.98961	0	12.3524	4
NAMPT	6.94286	0	10.7012	1
IL1R2	6.94286	0	10.7012	1
IGF1R	6.87273	200.367	11.7179	3
BCL2L1	6.70909	132	11.0385	2
PLCG2	6.68571	77.3333	11.1845	3
RAB7A	6.66234	0	11.1218	3
GABARAPL1	6.66234	0	11.1218	3
GABARAPL2	6.66234	0	11.1218	3
KLRD1	6.19481	0	8.64802	1
PTK2	6.17143	132	9.6004	2
BIRC2	5.96104	68	9.04683	2
VAV1	5.89091	0	8.3504	1
NCK2	5.42338	68	8.17659	2
TRAF1	5.16623	0	7.18932	1
PAK1	4.62857	0	6.59646	1
